# Supplementary material
Source: PubMed Central journal article supplement (PMC3725048)
Supplement: 1305025110_pnas.201305025SI.pdf [file 1305025110_pnas.201305025SI.pdf]

# Supporting Information

Jung et al. 10.1073/pnas.1305025110

## SI Text

### The Capacity Contributions from Carbonaceous Components

The capacity contributions from the carbonized polydopamine and Super P were calculated on the basis of the following procedure. It should be particularly noted that the mass of Super P was not counted in the total mass of the active material following conventional capacity calculation in most reports, although it contributes to the total capacity.

- Capacity contribution of Super P in carbon-coated rice husk Si ( $c\text{-Si}_{\text{RH}}$ ) electrode (%):

$$\frac{(\text{Weight content of Super P} \times \text{Capacity}_{\text{Super P}})}{\text{Capacity}_{c\text{-Si}_{\text{RH}}}} \times 100 = (0.2 \times 170) / 1,615 \times 100 = 2\%.$$

- Capacity contribution of carbonized polydopamine in  $c\text{-Si}_{\text{RH}}$  (%):

$$\frac{(\text{Weight content of carbonized polydopamine in } c\text{-Si}_{\text{RH}} \times \text{Capacity}_{\text{carbonized polydopamine}})}{(\text{Capacity}_{c\text{-Si}_{\text{RH}}} - \text{Weight content of Super P} \times \text{Capacity}_{\text{Super P}})} \times 100 = (0.08 \times 196) / (1,615 - 0.2 \times 170) \times 100 = 1\%.$$



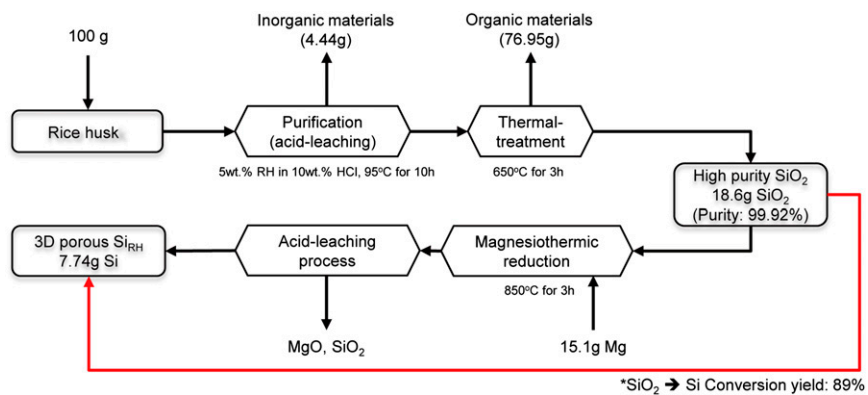

Fig. S2. Flowchart summarizing the synthetic procedures to obtain  $\text{Si}_{\text{RH}}$  from original rice husks.

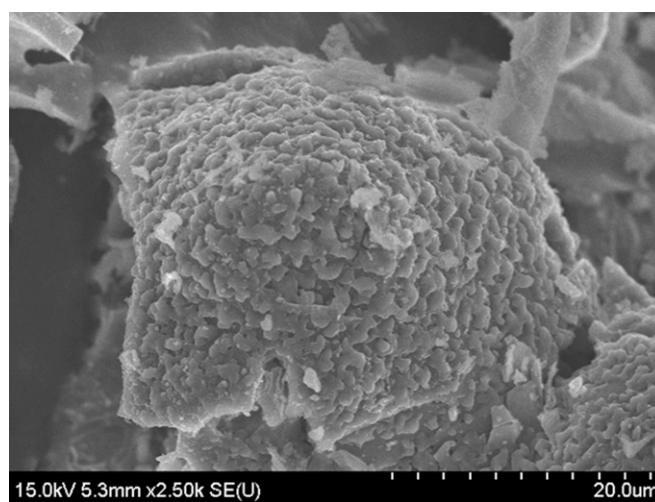

Fig. S3. SEM image of the RH-originated silicon obtained from the same synthetic procedure but with no acid treatment, indicating that the original nanoporous structure collapses if the acid treatment is omitted.





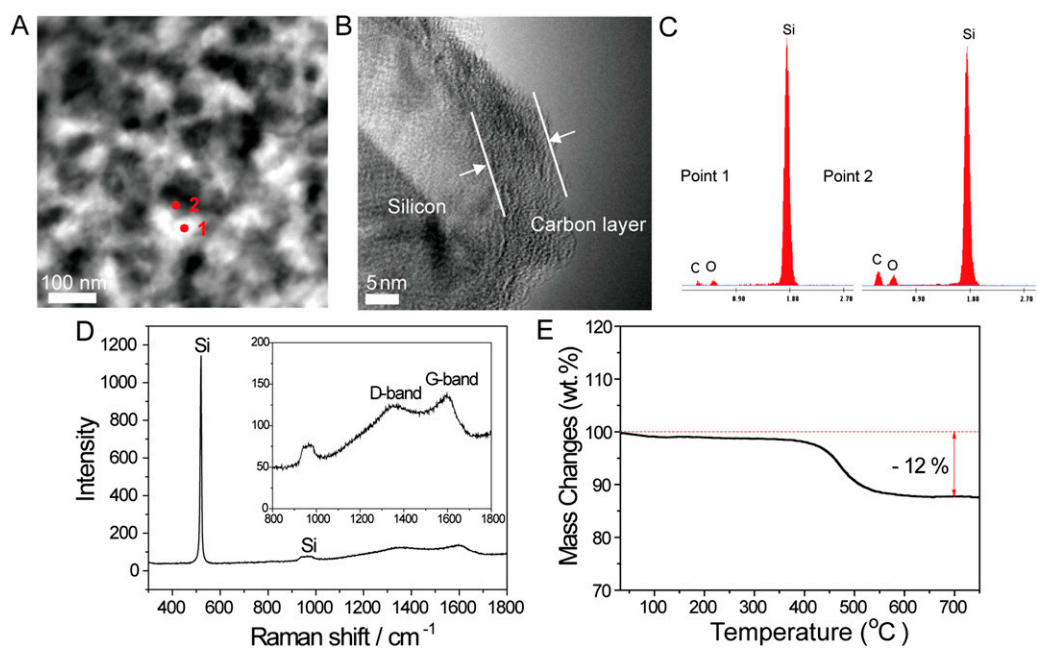

**Fig. 56.** Characterization of carbon-coated 3D nanoporous rice husk-originated Si ( $c\text{-Si}_{\text{RH}}$ ). (A and B) STEM and HRTEM images of  $c\text{-Si}_{\text{RH}}$  revealing the preserved interconnected 3D-porous structure after the carbon coating. (C) Energy-dispersive X-ray spectra from points 1 and 2 in A. (D and E) Raman spectrum (D) and thermogravimetric analysis (TGA) curve (E) of  $c\text{-Si}_{\text{RH}}$ .

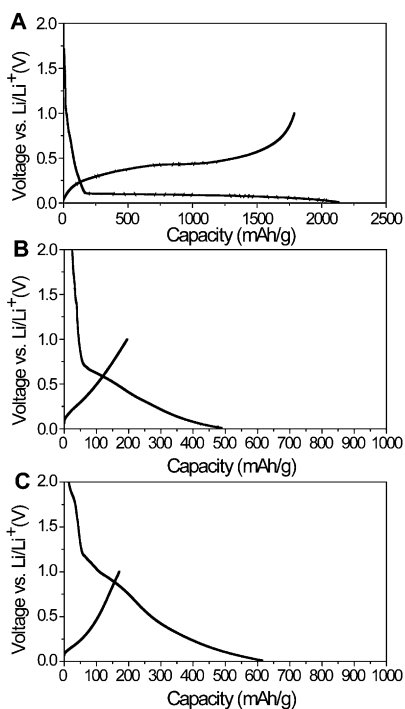

|                                                     | Charge capacity (mAh/g) | Discharge capacity (mAh/g) | Coulombic efficiency (%) |
|-----------------------------------------------------|-------------------------|----------------------------|--------------------------|
| Carbonized polydopamine                             | 488.42                  | 195.65                     | 40                       |
| Super P                                             | 614.98                  | 170.76                     | 28                       |
| Rice husk originated Si ( $\text{Si}_{\text{RH}}$ ) | 2132                    | 1788.8                     | 83.9                     |
| $c\text{-Si}_{\text{RH}}$                           | 1918                    | 1615                       | 84.2                     |

**Fig. 57.** (A–C) The first galvanostatic profiles of (A)  $\text{Si}_{\text{RH}}$ , (B) carbonized polydopamine, and (C) Super P with detailed specific capacities and coulombic efficiencies denoted (C, Lower).



**Table S1. Contents of metallic ingredients in wt% for RHs after the heat treatment**

| Element   | Bare RHS, $\mu\text{g/g}$ |
|-----------|---------------------------|
| Al        | 282.75                    |
| B         | 12.4                      |
| Ba        | 46.18                     |
| Ca        | 7,942.5                   |
| Co        | ND                        |
| Cr        | 17.91                     |
| K         | 31,347.79                 |
| La        | ND                        |
| Li        | ND                        |
| Mn        | 2,448.63                  |
| Na        | 799.25                    |
| Ni        | ND                        |
| P         | ND                        |
| Sr        | 26.39                     |
| Ti        | 20.74                     |
| V         | ND                        |
| Zn        | 166.82                    |
| Zr        | ND                        |
| Mg        | 2,079.17                  |
| Sum       | 45,190.53                 |
| Purity, % | 95.48                     |

The analysis indicates that the purity of the RH-originated silica obtained with no acid-treatment is 95.48%.
